# Supplementary material
Source: PubMed Central journal article supplement (PMC6365834)
Supplement: a488c3f09323f91a750e68e36f57b4e5_AEM.02459-18-s0001.pdf [file a488c3f09323f91a750e68e36f57b4e5_AEM.02459-18-s0001.pdf]

Supplemental Material

**Two photolyases repair distinct DNA lesions and reactivate  
UVB-inactivated conidia of an insect mycopathogen under visible light**

**Ding-Yi Wang,<sup>1</sup> Bo Fu,<sup>1</sup> Sen-Miao Tong,<sup>1,2\*</sup> Sheng-Hua Ying<sup>1</sup>, Ming-Guang Feng<sup>1\*</sup>**

<sup>1</sup> Institute of Microbiology, College of Life Sciences, Zhejiang University, Hangzhou, Zhejiang, 310058, China (\*For correspondence. E-mail: mgfeng@zju.edu.cn)

<sup>2</sup> College of Agricultural and Food Science, Zhejiang A&F University, Lin'an, Zhejiang, 311300, China (\*For co-correspondence. E-mail: tongsm@zafu.edu.cn)

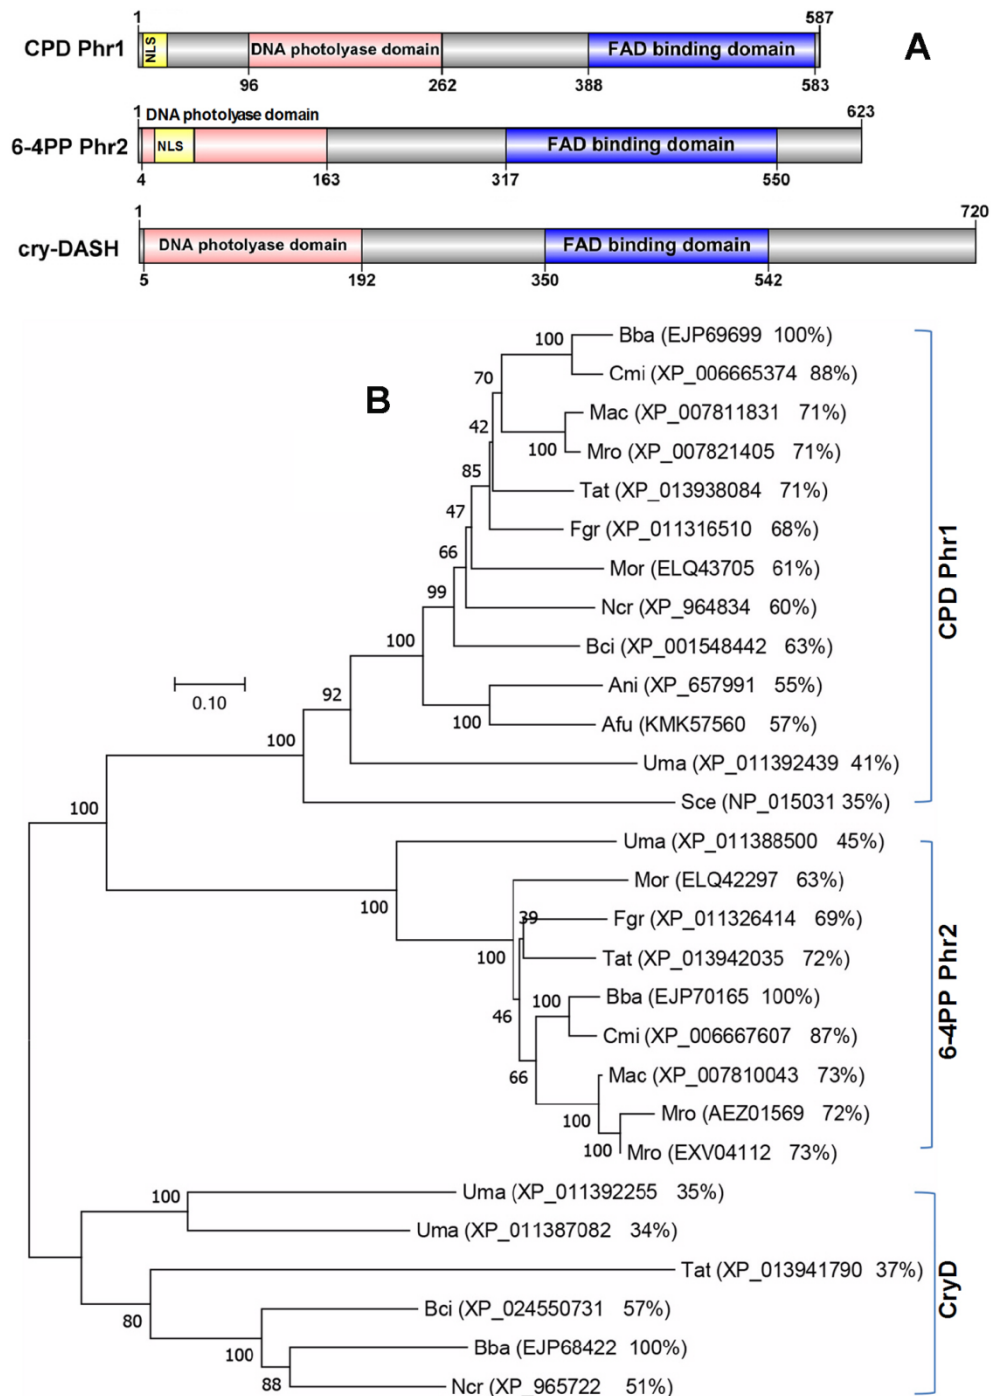

**FIG S1** Bioinformatic analysis of cryptochrome/photolyase family members in selected fungi. **(A)** Structural features of CPD Phr1, 6-4PP Phr2 and CryD (cry-DASH) in *B. bassiana*. **(B)** Phylogenetic linkages of *B. bassiana* Phr1, Phr2 and CryD with the homologs of other entomopathogenic and non-entomopathogenic fungi. The NCBI accession code of each protein and the identity of its sequence to the *B. bassiana* (Bba) counterpart are given in the parentheses following the abbreviated fungal name (Afu, *Aspergillus fumigatus*; Ani, *A. nidulans*; Bci, *Botrytis cinerea*; Cmi, *Cordyceps militaris*; Fgr, *Fusarium graminearum*; Mac, *Metarhizium acridum*; Mor, *Magnaporthe oryzae*; Mro, *Metarhizium robertsii*; Ncr, *Neurospora crassa*; Sce, *Saccharomyces cerevisiae*; Tat, *Trichoderma atroviride*; Uma, *Ustilago maydis*). The bootstrap values of 1000 replications are given at nodes. Scale: branch length proportional to genetic distance assessed with the neighbor-joining method in MEGA7 software at <http://www.megasoftware.net>.

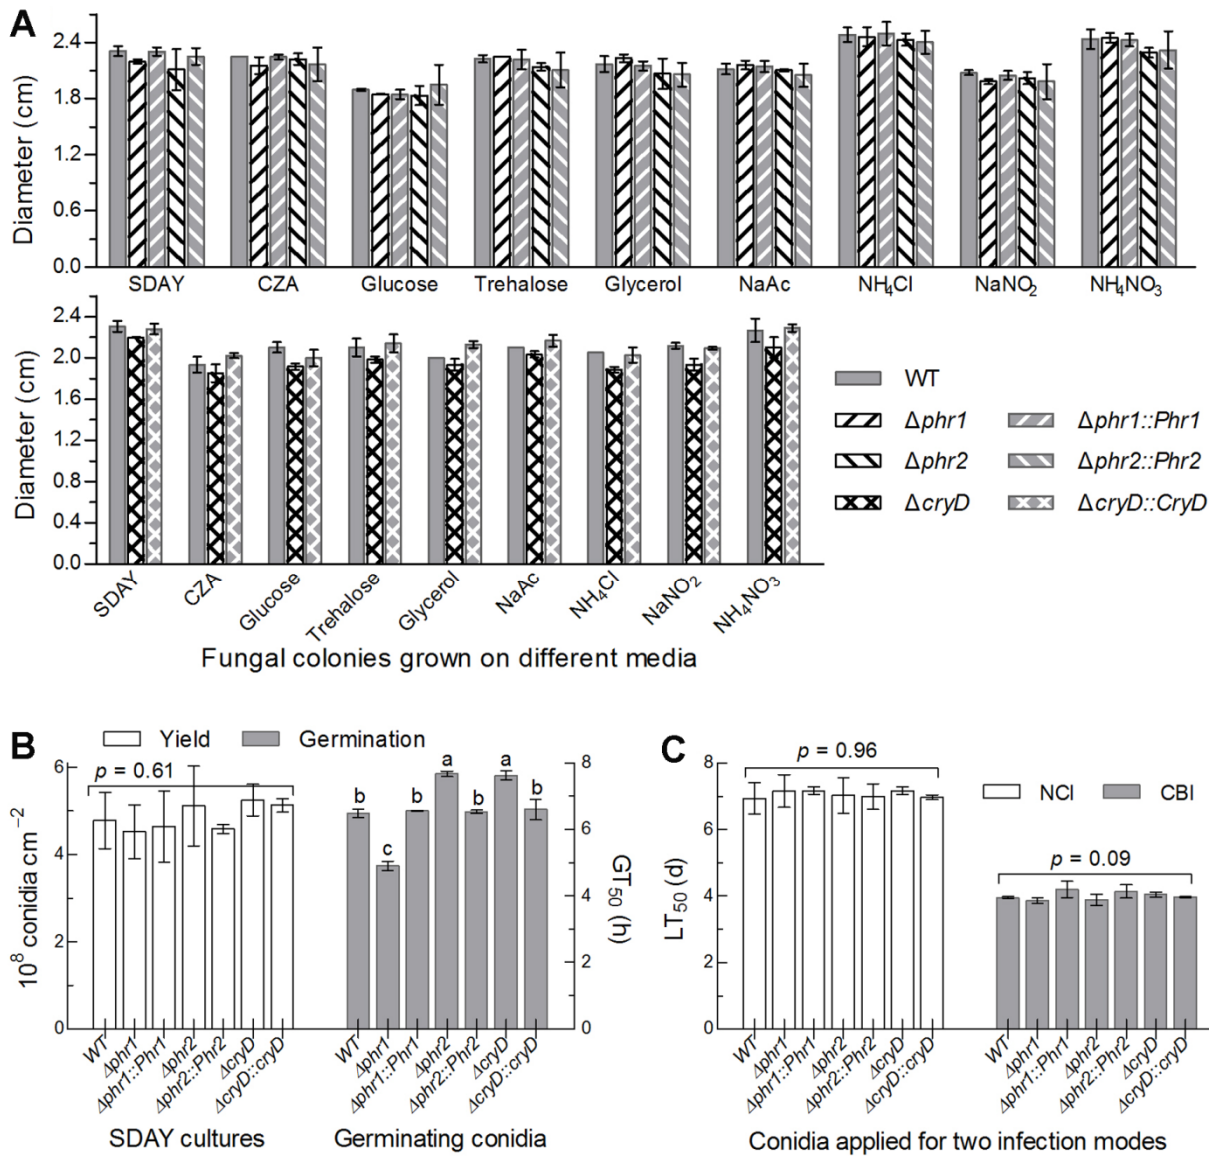

**FIG S2** Singular deletions of *Phr1*, *Phr2* and *CryD* in *B. bassiana* affect conidial germination but are not influential on growth rates, conidiation capacity and virulence. **(A)** Diameters of fungal colonies after 8 days of incubation at 25°C and L:D 12:12 on rich SDAY, minimal CDA and modified CDAs with different carbon or nitrogen sources. Each colony was initiated with 1  $\mu$ l of a  $10^6$  conidia  $ml^{-1}$  suspension. **(B)** Conidial yields in the 8-day-old SDAY cultures, which were initiated by spreading 100  $\mu$ l of a  $10^6$  conidia  $ml^{-1}$  suspension per plate and incubated at 25°C and L:D 12:12, and GT<sub>50</sub> estimates for 50% germination of collected conidia at 25°C. **(C)** LT<sub>50</sub> estimates for the virulence of deletion mutants and control strains to *G. mellonella* larvae, which were inoculated by topical application (immersion) of a  $10^7$  conidia  $ml^{-1}$  suspension for normal cuticle infection (NCI) or intrahemocoel injection of 5  $\mu$ l of a  $10^5$  conidia  $ml^{-1}$  suspension per larva for cuticle-bypassing infection (CBI). The *p* values indicate no significant variability for the examined phenotypes of all strains. Different lowercase letters represent significant differences (Tukey's HSD, *p* < 0.05). Error bars: SD from three replicates.

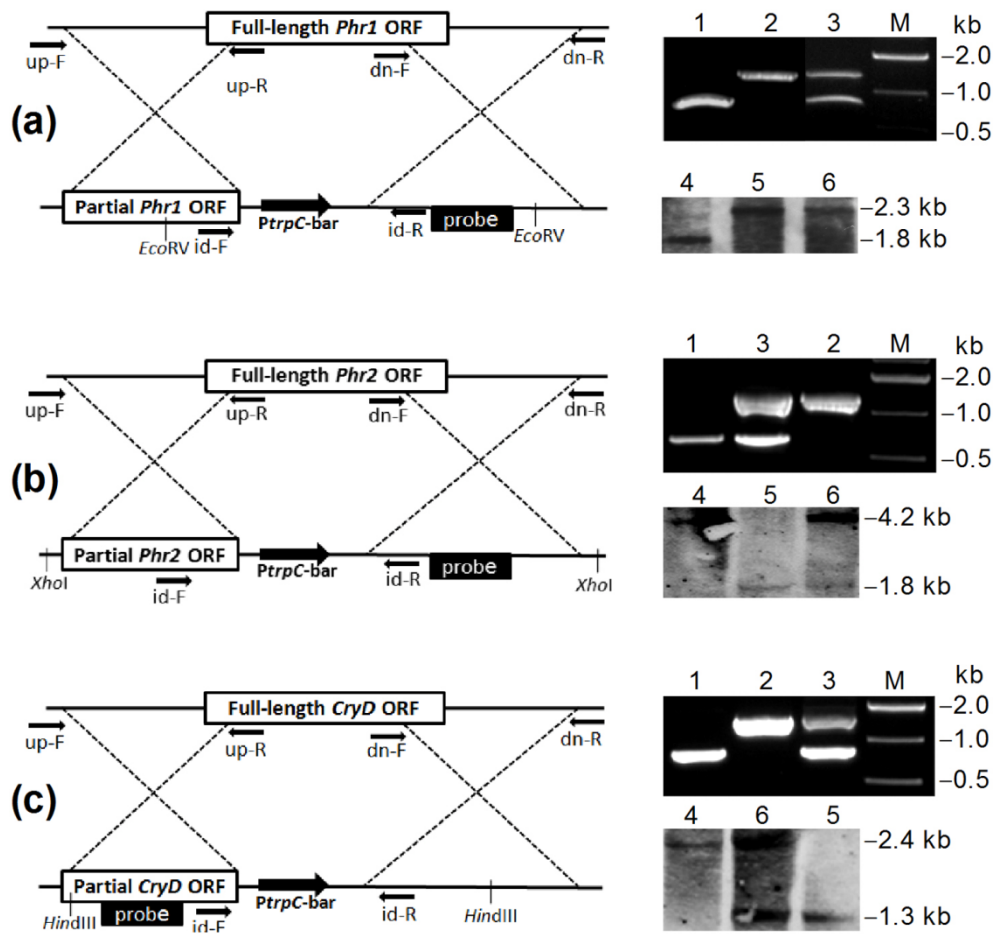

**FIG S3** Schematic diagram for the deletion strategy of *phr1* (A), *phr2* (B) and *cryD* (C) in *B. bassiana* and their mutants identified through PCR (lanes 1–3) and Southern blot (lanes 4–6) analyses with paired primers and amplified probes (Table S1). Lanes 1 and 4: wild-type. Lanes 2 and 5: deletion mutants. Lanes 3 and 6: complementary mutants. Genomic DNA of each strain was digested with *EcoRV*, *XhoI* and *HindIII* at the marked sites to probe *phr1*, *phr2* and *cryD* through Southern blotting hybridization, respectively.

**Table S1.** Paired primers designed for manipulation of *Phr1*, *Phr2* and *CryD* in *B. bassiana*.

| Primers     | Paired sequences (5'-3')*                                                                                                       | Purpose                                                                      |
|-------------|---------------------------------------------------------------------------------------------------------------------------------|------------------------------------------------------------------------------|
| Ptef-F/R    | <u>CCACCATGTTGGGCCCGGCGCGCCTACTGCCGCAAGCAATTCCTTA</u> / <u>CAGGTCGACGGATCCC</u><br><u>CGGGTTTGAAGGTGTTTGAT</u>                  | Cloning <i>Tef</i> promoter (1369 bp)                                        |
| cPhr1-F/R   | <u>CAATCACAACACCTTCAAAATGGCGCCTCGTGCAACGAAGCG</u> / <u>CTTGCTCACCATGAATTC</u><br><u>GATATCCTACGCCACAGCCGCTTGACGCA</u>           | Cloning <i>phr1</i> cDNA (1764 bp)<br>for fusion with <i>GFP</i>             |
| cPhr2-F/R   | <u>CAATCACAACACCTTCAAAATGACAAAGCCAGAGTCATTATT</u> / <u>CTTGCTCACCATGAATTC</u><br><u>GATATCCTACGTTTTCTGCTTCTTCGCTGAC</u>         | Cloning <i>phr2</i> cDNA (1872 bp)<br>for fusion with <i>GFP</i>             |
| cCryD-F/R   | <u>CAATCACAACACCTTCAAAATGACTGCCAGCAGAGTTCCTGCT</u> / <u>CTTGCTCACCATGAATTC</u><br><u>GATATCGTTGGGCATATACCTCCTCTGCCT</u>         | Cloning <i>cryD</i> cDNA (2163 bp)<br>for fusion with <i>GFP</i>             |
| Phr1up-F/R  | <u>TGGGCCCGCGCGCCGAATTC</u> TCTTGAAGCGACGGTGT / <u>TGGCTGCAGGTCGACGGAT</u><br><u>CTGGCGAGTTGCTGTTGTA</u>                        | Cloning <i>phr1</i> 5'-end (1428 bp)<br>for <i>Phr1</i> deletion             |
| Phr1dn-F/R  | <u>GACCCATGGCTCGAGTCTAGAGACTTCGAGGCTCATCTCA</u> / <u>GTGGCTAGCGTTAACTACTA</u><br><u>GTAACAATAGTCTGCTGTTGGA</u>                  | Cloning <i>phr1</i> 3'-end (1532 bp)<br>for <i>phr1</i> deletion             |
| Phr2up-F/R  | <u>TGGGCCCGCGCGCCGAATTC</u> CAGAAGCCAGCTCCATTC / <u>TGGCTGCAGGTCGACGGAT</u><br><u>CCACGGCACTTTGCTCTCAGTAG</u>                   | Cloning <i>phr2</i> 5'-end (1458 bp)<br>for <i>phr2</i> deletion             |
| Phr2dn-F/R  | <u>GACCCATGGCTCGAGTCTAGACC</u> CGCTCCATCACCAAGCT / <u>GGTGGTGGTGGCTAGCGTTA</u><br><u>ACGCCGCAAGGCAAATCTCG</u>                   | Cloning <i>phr2</i> 3'-end (1447 bp)<br>for <i>phr2</i> deletion             |
| CryDup-F/R  | <u>TGGGCCCGCGCGCCGAATTC</u> AGTTGAACATTATTGTTGGTAC / <u>TGGCTGCAGGTCGACG</u><br><u>GATCCGAGTTGAAGGAGGAGAACC</u>                 | Cloning <i>cryD</i> 5'-end (1477 bp)<br>for <i>cryD</i> deletion             |
| CryDdn-F/R  | <u>GACCCATGGCTCGAGTCTAGAA</u> TACCCTTTCTCCACCA / <u>GTGGCTAGCGTTAACTACTAGT</u><br><u>ATTGCCAATTAGCCAGT</u>                      | Cloning <i>cryD</i> 3'-end (1235 bp)<br>for <i>cryD</i> deletion             |
| Phr1fl-F/R  | <u>GGGGACAAGTTTGTACAAAAAAGCAGGCTCGTTTGTAAATGGCAATAGATG</u> / <u>GGGGACCAC</u><br><u>TTGTACAAGAAAGCTGGGTGTTGACCGATTCTGTAGATG</u> | Cloning full-length <i>phr1</i> (4616 bp)<br>for <i>phr1</i> complementation |
| Phr2fl-F/R  | <u>GGGGACAAGTTTGTACAAAAAAGCAGGCTCATCTGGGAAATGAAAGGA</u> / <u>GGGGACCACT</u><br><u>TTGTACAAGAAAGCTGGGTCCAGCCGAGTATTACGAT</u>     | Cloning full-length <i>phr2</i> (5636 bp)<br>for <i>phr2</i> complementation |
| CryDfl-F/R  | <u>GGGGACAAGTTTGTACAAAAAAGCAGGCTCGATATCTGCGGTGAGC</u> / <u>GGGGACCACTT</u><br><u>TGTACAAGAAAGCTGGGTAGCCGTGATTTCTTCTGC</u>       | Cloning full-length <i>cryD</i> (5678 bp)<br>for <i>cryD</i> complementation |
| pPhr1-F/R   | AAAAAGAGAATCCGTCTTCACTTACA / AAAAAGCCAGTAGCCTTATTATCTTG                                                                         | PCR detecting <i>phr1</i>                                                    |
| pPhr2-F/R   | AAAAAGTTCACATCATTTCTCCACCAC / AAAAAGCTTCGACCGCAGCATCT                                                                           | PCR detecting <i>phr2</i>                                                    |
| pCryD-F/R   | AAAAAGATTCCGGTTCGCTTCTG / AAAAAAGGCACATCGTCAGTCATC                                                                              | PCR detecting <i>cryD</i>                                                    |
| sbPhr1-F/R  | CTGTCCGCGGAAGAAC / GACTAATACGTGGCGATAAA                                                                                         | Southern probe of <i>phr1</i> (302 bp)                                       |
| sbPhr2-F/R  | TACAGCCCCGTCTCGT / CCGCAAGGCAAATCTC                                                                                             | Southern probe of <i>phr2</i> (250 bp)                                       |
| sbCryD-F/R  | CGCTATCAAGGGTCCAAA/GTGACGGGCTCGACAAAG                                                                                           | Southern probe of <i>cryD</i> (284 bp)                                       |
| qActin-F/R  | GGCAACATTGTCTGCTGTTGTTGCTGGAAGGTGGATAGG                                                                                         | qPCR detecting $\beta$ -actin                                                |
| qPhr1-F/R   | CACCGCAAGAGACAGAAACA/AGCGTTAAAGTGCTCGGTGT                                                                                       | qPCR detecting <i>phr1</i>                                                   |
| qPhr2-F/R   | TCATTTATTGGTTCCGCACA/GCTTGGATTGGAGTTGAGC                                                                                        | qPCR detecting <i>phr2</i>                                                   |
| qCryD-F/R   | CGTATTACCTCCCGACCAGA/GCACTGCAGATGCTGGATAA                                                                                       | qPCR detecting <i>cryD</i>                                                   |
| OEphr1-F/R  | <u>CAAACACCTTCAAACCCGGGATGGCGCCTCGTGCAACGAAGCG</u> / <u>GGCTGCAGGTCGACGGAT</u><br><u>CCCTACGCCACAGCCGCTTGACGCA</u>              | Cloning <i>phr1</i> cDNA (1764 bp)<br>for overexpression                     |
| OEphr2-F/R  | <u>CAAACACCTTCAAACCCGGGATGACAAAGCCAGAGTCATTATT</u> / <u>GGCTGCAGGTCGACGGAT</u><br><u>CCTCACGTTTTCTGCTTCTTCGCTGAC</u>            | Cloning <i>phr2</i> cDNA (1872 bp)<br>for overexpression                     |
| pOEphr1-F/R | TACTGCCGCAAGCAATTCCTTA / CTACGCCACAGCCGCTTGACGCA                                                                                | PCR detecting OE <i>Phr1</i>                                                 |
| pOEphr2-F/R | TACTGCCGCAAGCAATTCCTTA / TCACGTTTTCTGCTTCTTCGCTGAC                                                                              | PCR detecting OE <i>Phr2</i>                                                 |

\* Blue regions denote the restriction enzyme sites for the deletion of *phr1* (*EcoRI/BamHI* and *XbaI/SpeI*), *phr2* (*EcoRI/BamHI* and *XbaI/HpaI*) or *cryD* (*EcoRI/BamHI* and *XbaI/SpeI*), or for the fusion of *phr1*, *phr2* or *cryD* cDNA (*EcoRV*) to *GFP*. Underlined regions denote the fragments for the fusion of *phr1*, *phr2* or *cryD* to *GFP*, the targeted gene deletion, or the gateway exchange for targeted gene complementation or overexpression.
